# Supplementary material for: hERG1 behaves as biomarker of progression to adenocarcinoma in Barrett's esophagus and can be exploited for a novel endoscopic surveillance
Source: PubMed Central journal article supplement (PMC5312329; doi:10.18632/oncotarget.11149), 2016-08-09
Supplement: oncotarget-07-59535-s001.pdf [file oncotarget-07-59535-s001.pdf]

# hERG1 behaves as biomarker of progression to adenocarcinoma in Barrett's esophagus and can be exploited for a novel endoscopic surveillance

## Supplementary Materials

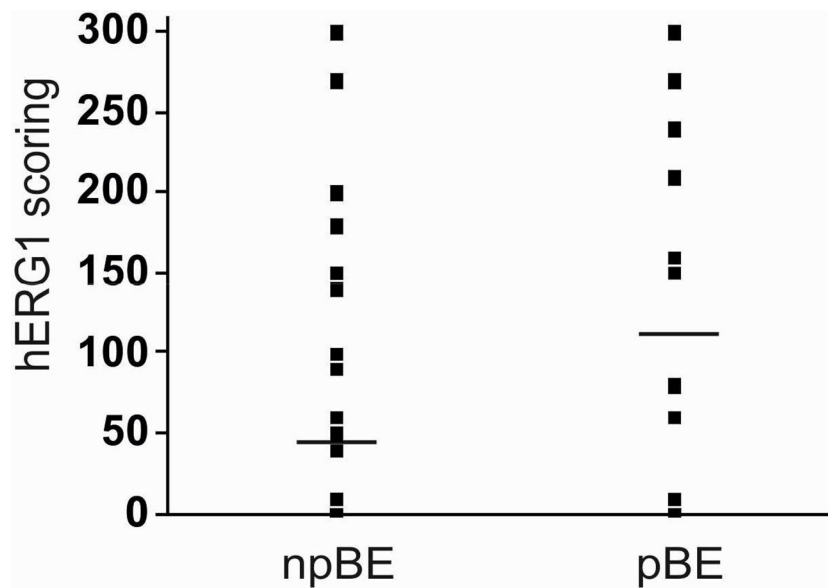

**Supplementary Figure S1: Scatter Plot summarizing hERG1 scoring in the two different groups (npBE, pBE).** Samples were scored as described in Materials and Methods. Each point represents a patient. Horizontal lines represent the mean value for hERG1 scoring in each group.

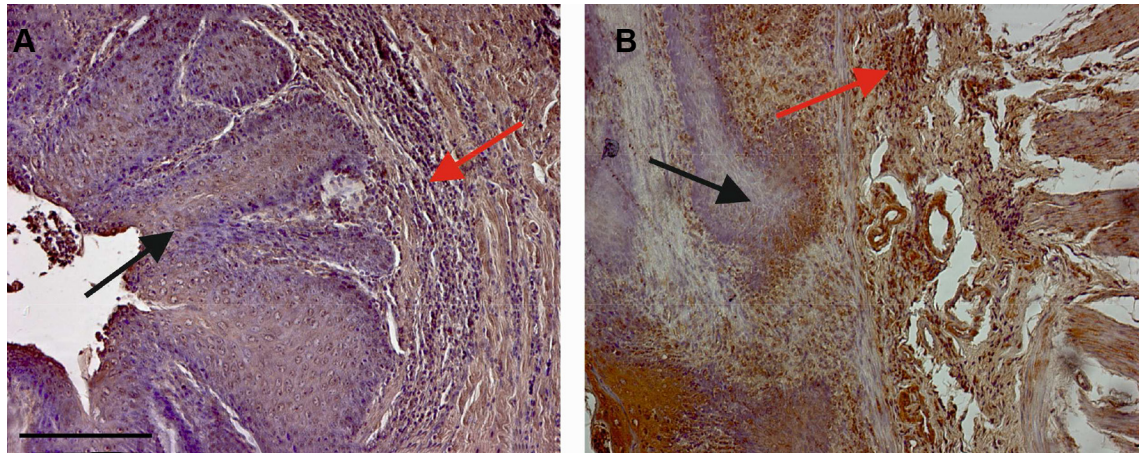

Supplementary Figure S2: Representative pictures of immunohistochemistry performed with anti-hERG1 polyclonal antibody (as described in Materials and Methods) showing that hERG1 protein is not expressed in normal esophageal tissue and in esophagitis. (A) “surgical model”; (B) “chemical model”. Original magnification 20×. Scale bar: 100 μm.

Supplementary Table S1: hERG1 scoring in 5 patient-matched pBE, ED and EA

|     | pBE |           |       | ED |           |       | EA  |           |       |
|-----|-----|-----------|-------|----|-----------|-------|-----|-----------|-------|
|     | %   | intensity | score | %  | intensity | score | %   | intensity | score |
| Pt1 | 10  | 1         | 10    | 80 | 3         | 240   | 90  | 3         | 270   |
| Pt2 | 100 | 2         | 200   | 80 | 3         | 240   | 100 | 3         | 300   |
| Pt3 | 90  | 3         | 270   | 90 | 3         | 270   | 100 | 3         | 300   |
| Pt4 | 90  | 3         | 270   | 90 | 3         | 270   | 90  | 3         | 270   |
| Pt5 | 0   | 0         | 0     | 0  | 0         | 0     | 0   | 0         | 0     |

Supplementary Table S2: Results of hERG1 expression on 26 pBE and ED/EA matched samples from patients included in the case-control study

|       | pBE     |         |       |
|-------|---------|---------|-------|
|       | hERG1 – | hERG1 + | TOTAL |
| ED/EA | 2       | 0       | 2     |
|       | 4       | 20      | 24    |
| TOTAL | 6       | 20      | 26    |

hERG1 positivity: pBE = 76.9%, ED/EA = 92.3%; McNemar’s test,  $P = 0.045$ .
